# Supplementary material for: Standardised uptake values as determined on prostate‐specific membrane antigen positron emission tomography/computed tomography is associated with oncological outcomes in patients with prostate cancer
Source: PubMed Central journal article supplement — BJU Int. 2022 Mar 12;129(6):768–76. doi: 10.1111/bju.15710 (PMC9315142; doi:10.1111/bju.15710), 2022-03-12
Supplement: BJU-129-768-s001.pdf [file BJU-129-768-s001.pdf]

**Supplement 1.** The diagnostic value of (A)  $^{18}\text{F}$ -PSMA PET/CT and (B)  $^{68}\text{Ga}$ -PSMA PET/CT for detecting lymph-node metastatic disease, and (C) the size of PET/CT-detected and missed lymph node metastases after pelvic lymph node dissection.

| (A) $^{18}\text{F}$ -PSMA PET/CT                                                                                                                                                        |                                     |                                       |       |              |            |
|-----------------------------------------------------------------------------------------------------------------------------------------------------------------------------------------|-------------------------------------|---------------------------------------|-------|--------------|------------|
|                                                                                                                                                                                         | pN1                                 | pN0                                   | Total | % (95% CI)   |            |
| cN1                                                                                                                                                                                     | 15                                  | 8                                     | 21    | 65 (48-79)   | PPV        |
| cN0                                                                                                                                                                                     | 6                                   | 94                                    | 102   | 94 (89-97)   | NPV        |
| Total                                                                                                                                                                                   | 23                                  | 100                                   | 123   | 17           | Prevalence |
| % (95% CI)                                                                                                                                                                              | 71 (48-89)                          | 92 (85-97)                            |       |              |            |
|                                                                                                                                                                                         | Sensitivity                         | Specificity                           |       |              |            |
| (B) $^{68}\text{Ga}$ -PSMA PET/CT                                                                                                                                                       |                                     |                                       |       |              |            |
|                                                                                                                                                                                         | pN1                                 | pN0                                   | Total | % (95% CI)   |            |
| cN1                                                                                                                                                                                     | 15                                  | 10                                    | 25    | 60.0 (42-76) | PPV        |
| cN0                                                                                                                                                                                     | 32                                  | 108                                   | 140   | 77 (73-81)   | NPV        |
| Total                                                                                                                                                                                   | 47                                  | 118                                   | 165   | 29           | Prevalence |
| % (95% CI)                                                                                                                                                                              | 32 (19-47)                          | 92 (85-96)                            |       |              |            |
|                                                                                                                                                                                         | Sensitivity                         | Specificity                           |       |              |            |
| (C)                                                                                                                                                                                     |                                     |                                       |       |              |            |
|                                                                                                                                                                                         | $^{18}\text{F}$ -PSMA PET/CT (N=48) | $^{68}\text{Ga}$ -PSMA PET/CT (N=107) |       |              |            |
| Median size missed metastases (IQR) (mm)                                                                                                                                                | 1.8 (1.0-4.8)                       | 2.1 (1.0-3.75)                        |       |              |            |
| Median size detected metastases (IQR) (mm)                                                                                                                                              | 6.0 (2.9-7.8)                       | 3.0 (4.0-7.0)                         |       |              |            |
| p-value                                                                                                                                                                                 | p=0.003                             | p<0.0001                              |       |              |            |
| CI= Confidence interval; IQR = Interquartile range; PET =Positron Emission Tomography; MRI = Magnetic Resonance imaging; PPV= Positive predictive value; NPV= Negative predictive value |                                     |                                       |       |              |            |
